# Supplementary material for: Impacts of Neoadjuvant Chemotherapy on Perioperative Outcomes in Patients with Bladder Cancer Treated with Radical Cystectomy: A Single High-Volume Center Experience
Source: MDPI journal article supplement (doi:10.3390/jpm14020212), 2024-02-16
Supplement: s1 [file s1]

**Table S1.** Covariates considered for each variable in propensity score matching

| <b>Variable</b>                | <b>Covariates</b>                                                                   |
|--------------------------------|-------------------------------------------------------------------------------------|
| <b>CD 3-5</b>                  | CCI, BMI, Stage, UD, Approach                                                       |
| <b>OT</b>                      | CCI, BMI, Stage, UD, Approach, Presence of hydronephrosis                           |
| <b>LOS</b>                     | CCI, BMI, Stage, UD, Approach, ERAS                                                 |
| <b>24-hour drop hemoglobin</b> | CCI, BMI, Stage, Transfusions, preoperative HB, Antiplatelets/Anticoagulant therapy |
| <b>Transfusions</b>            | CCI, BMI, Stage, preoperative HB, Antiplatelets/Anticoagulant therapy               |
| <b>AKI</b>                     | CCI, BMI, preoperative eGFR, Presence of hydronephrosis, UD, Approach               |

CD = Clavien Dindo; CCI = Charlson Comorbidity Index; BMI = Body Mass Index; UD = Urinary Diversion; OT = Operation Time; LOS = Length of Stay; ERAS = Enhanced Recovery After Surgery; HB = Hemoglobin; AKI = Acute Kidney Injury; eGFR = estimated Glomerular Filtration Rate
